## CORRECTION

# A local VE-cadherin and Trio-based signaling complex stabilizes endothelial junctions through Rac1

**Ilse Timmerman, Niels Heemskerk, Jeffrey Kroon, Antje Schaefer, Jos van Rijssel, Mark Hoogenboezem, Jakobus van Unen, Joachim Goedhart, Theodorus W. J. Gadella, Jr, Taofei Yin, Yi Wu, Stephan Huveneers and Jaap D. van Buul**

There was an error published in *J. Cell Sci.* **128**, 3041-3054.

The name of Dr Fukuhara was incomplete in the acknowledgements section. The complete acknowledgements section should read as below.

### Acknowledgements

We wish to thank Dr Giampietro Schiavo (London, UK) and Dr Veronika Neubrand (Granada, Spain) for the GST–spectrin-repeat constructs. We wish to thank Dr Shigetomo Fukuhara and Dr Naoki Mochizuki (Osaka, Japan) for the kind gifts of the VEcadherin mutants. GFP–TrioFL was a kind gift from Anne Debant and Philippe Fort (both at Macromolecular Biochemistry Research Center, Montpellier, France). MycTrioFL was a kind gift from Betty Eipper, University of Connecticut, Farmington, CT. We also wish to thank Anna E. Daniel for providing data. We sincerely thank Professor Dr Peter Hordijk for critically reading the manuscript. We wish to thank Dr Louis Hodgson (Department of Anatomy & Structural Biology, Albert Einstein University, New York, NY) for the Trio mutant constructs.

We apologise to the readers for any confusion that this error might have caused.
